# Supplementary material
Source: Springer Nature journal article supplement (https://www.springermedizin.de/resource/supplementary/13058_2013_3270_MOESM5_ESM.pdf/9703706)

**A**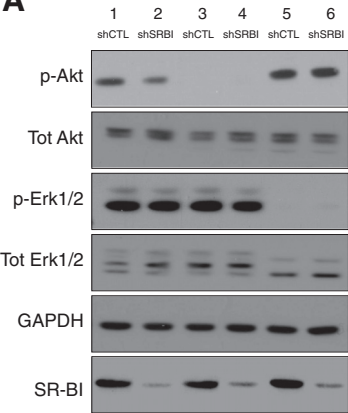

|          |   |   |   |   |   |   |
|----------|---|---|---|---|---|---|
| LY294002 | - | - | + | + | - | - |
| U0126    | - | - | - | - | + | + |

**B**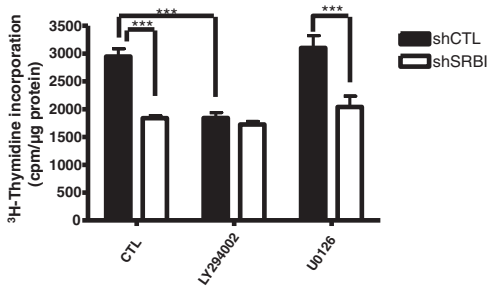

Supplement: MOESM5 [file 9703706]
